# Supplementary material for: Female Genitalia Concealment Promotes Intimate Male Courtship in a Water Strider
Source: PubMed Central journal article supplement (PMC2686155; doi:10.1371/journal.pone.0005793), 2009-06-10
Supplement: pone.0005793.s004.pdf [file pone.0005793.s004.pdf]

**Table S2.** S8/S6 and S7/S6 ratios with sample sizes for each of the 17 species presented in Figure 6 (see Figure 1 for definitions of S6, S7, and S8).

|                         | S8/S6 (mean±SD) | S7/S6 (mean±SD) | Number of samples | Sampling Site                                      |
|-------------------------|-----------------|-----------------|-------------------|----------------------------------------------------|
| <i>G. lacustris</i>     | 0.67 ± 0.02     | 1.01 ± 0.06     | 3                 | Palaeartic, Cornell University Insect Collection   |
| <i>G. comatus</i>       | 0.70 ± 0.04     | 1.04 ± 0.05     | 4                 | Nearctic, Cornell University Insect Collection     |
| <i>G. marginatus</i>    | 0.68 ± 0.06     | 0.98 ± 0.07     | 6                 | Nearctic, Cornell University Insect Collection     |
| <i>G. inseperatus</i>   | 0.64 ± 0.06     | 1.01 ± 0.08     | 5                 | Nearctic, Cornell University Insect Collection     |
| <i>G. latiabdominis</i> | 0.63 ± 0.04     | 0.97 ± 0.06     | 34                | Kimpo Ricefields, Seoul, Korea                     |
| <i>G. buenoi</i>        | 0.76 ± 0.08     | 1.25 ± 0.10     | 7                 | Nearctic, Cornell University Insect Collection     |
| <i>G. pingreensis</i>   | 1.07 ± 0.04     | 1.28 ± 0.11     | 3                 | Nearctic, Cornell University Insect Collection     |
| <i>G. incognitus</i>    | 0.98 ± 0.21     | 1.09 ± 0.10     | 6                 | Nearctic, Cornell University Insect Collection     |
| <i>G. gracilicornis</i> | 0.28 ± 0.03     | 1.30 ± 0.07     | 155               | Gwanak Mountain, Seoul, Korea                      |
| <i>A. remigis</i>       | 0.65 ± 0.12     | 1.39 ± 0.07     | 8                 | Nearctic, Cornell University Insect Collection     |
| <i>A. paludum</i>       | 0.52 ± 0.10     | 0.99 ± 0.05     | 21                | Gwanak Mountain, Seoul, Korea                      |
| <i>A. conformis</i>     | 0.64 ± 0.07     | 1.10 ± 0.04     | 3                 | Nearctic, Cornell University Insect Collection     |
| <i>A. nebularis</i>     | 0.61 ± 0.06     | 1.27 ± 0.06     | 12                | Nearctic, Cornell University Insect Collection     |
| <i>A. elongatus</i>     | 0.45 ± 0.03     | 0.76 ± 0.01     | 3                 | Jiri Mountain, Jeollanam-do, Korea                 |
| <i>A. najas</i>         | 0.46 ± 0.03     | 0.93 ± 0.03     | 3                 | Kurowka river near Pulawy, Lublin district, Poland |
| <i>L. dissortis</i>     | 0.68 ± 0.06     | 0.89 ± 0.03     | 5                 | Nearctic, Cornell University Insect Collection     |
| <i>L. notabilis</i>     | 0.60 ± 0.06     | 0.86 ± 0.16     | 6                 | Nearctic, Cornell University Insect Collection     |
